1 **Hydroxychloroquine plus azithromycin: a potential interest in reducing in-**  
2 **hospital morbidity due to COVID-19 pneumonia (HI-ZY-COVID)?**

3 Benjamin Davido<sup>1</sup>, Thibaud Lansaman<sup>2</sup>, Christine Lawrence<sup>3</sup>, Jean-Claude Alvarez<sup>4</sup>,  
4 Frédérique Bouchand<sup>5</sup>, Pierre Moine<sup>6</sup>, Véronique Perronne<sup>1</sup>, Aurelie Le Gal<sup>1</sup>, Djillali  
5 Annane<sup>6</sup>, Christian Perronne<sup>1</sup>, Pierre De Truchis<sup>1</sup>, on behalf of the COVID-19 RPC  
6 Team\*

7 ["The authors have withdrawn this manuscript and do not wish it to be cited. Because](#)  
8 [of controversy about hydroxychloroquine and the retrospective nature of their study,](#)  
9 [they intend to revise the manuscript after peer review"](#)

10

11

12

13

14

15

16

17

18

19

20

21

22

23

24

25
